# Supplementary material for: Polyoxygenated Sterols from the South China Sea Soft Coral Sinularia sp
Source: PubMed Central journal article supplement (PMC3407921; doi:10.3390/md10071422), 2012-06-26

## Supplementary Materials

**Figure S1.** HR-ESI-MS of compound **1**.

**Figure S2.** ESI-MS of compound **1**.

**Figure S3.**  $^1\text{H}$  NMR spectrum ( $\text{CDCl}_3$ , 600 MHz) of compound **1**.

**Figure S4.**  $^{13}\text{C}$  NMR and DEPT ( $\text{CDCl}_3$ , 125 MHz) spectra of compound **1**.

**Figure S5.** HMQC spectrum of compound **1**.

**Figure S6.**  $^1\text{H}$ - $^1\text{H}$  COSY spectrum of compound **1**.

**Figure S7.** HMBC spectrum of compound **1**.

**Figure S8.** NOESY spectrum of compound **1**.

**Figure S9.** HR-ESI-MS of compound **2**.

**Figure S10.** ESI-MS of compound **2**.

**Figure S11.**  $^1\text{H}$  NMR spectrum ( $\text{CD}_3\text{OD}$ , 600 MHz) of compound **2**.

**Figure S12.**  $^{13}\text{C}$  NMR and DEPT ( $\text{CD}_3\text{OD}$ , 125 MHz) spectra of compound **2**.

**Figure S13.** HMQC spectrum of compound **2**.

**Figure S14.**  $^1\text{H}$ - $^1\text{H}$  COSY spectrum of compound **2**.

**Figure S15.** HMBC spectrum of compound **2**.

**Figure S16.** NOESY spectrum of compound **2**.

**Figure S17.** HR-ESI-MS of compound **3**.

**Figure S18.** ESI-MS of compound **3**.

**Figure S19.**  $^1\text{H}$  NMR spectrum ( $\text{CDCl}_3$ , 600 MHz) of compound **3**.

**Figure S20.**  $^{13}\text{C}$  NMR and DEPT ( $\text{CDCl}_3$ , 125 MHz) spectra of compound **3**.

**Figure S21.** HMQC spectrum of compound **3**.

**Figure S22.**  $^1\text{H}$ - $^1\text{H}$  COSY spectrum of compound **3**.

**Figure S23.** HMBC spectrum of compound **3**.

**Figure S24.** NOESY spectrum of compound **3**.

**Figure S25.**  $^1\text{H}$  NMR spectrum ( $\text{CDCl}_3$ , 600 MHz) of **1s**.

**Figure S26.**  $^1\text{H}$ - $^1\text{H}$  COSY spectrum of **1s**.

**Figure S27.**  $^1\text{H}$  NMR spectrum ( $\text{CDCl}_3$ , 600 MHz) of **1r**.

**Figure S28.**  $^1\text{H}$ - $^1\text{H}$  COSY spectrum of **1r**.

Figure S1. HR-ESI-MS of compound 1.

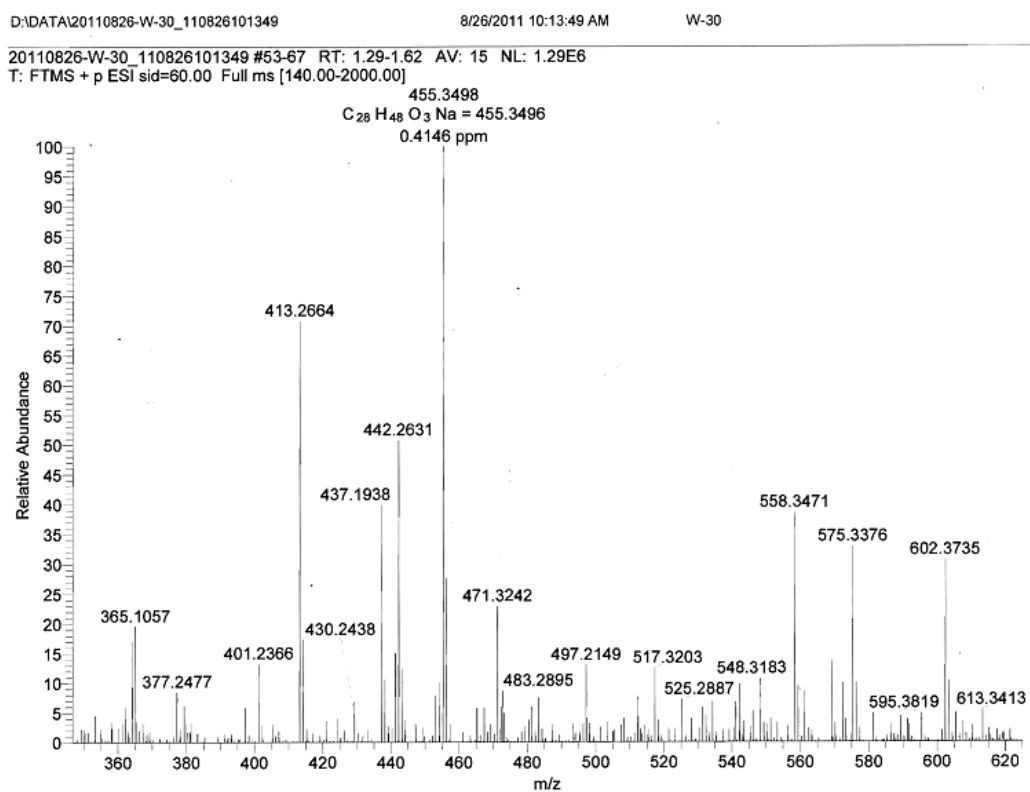

Figure S2. ESI-MS of compound 1.

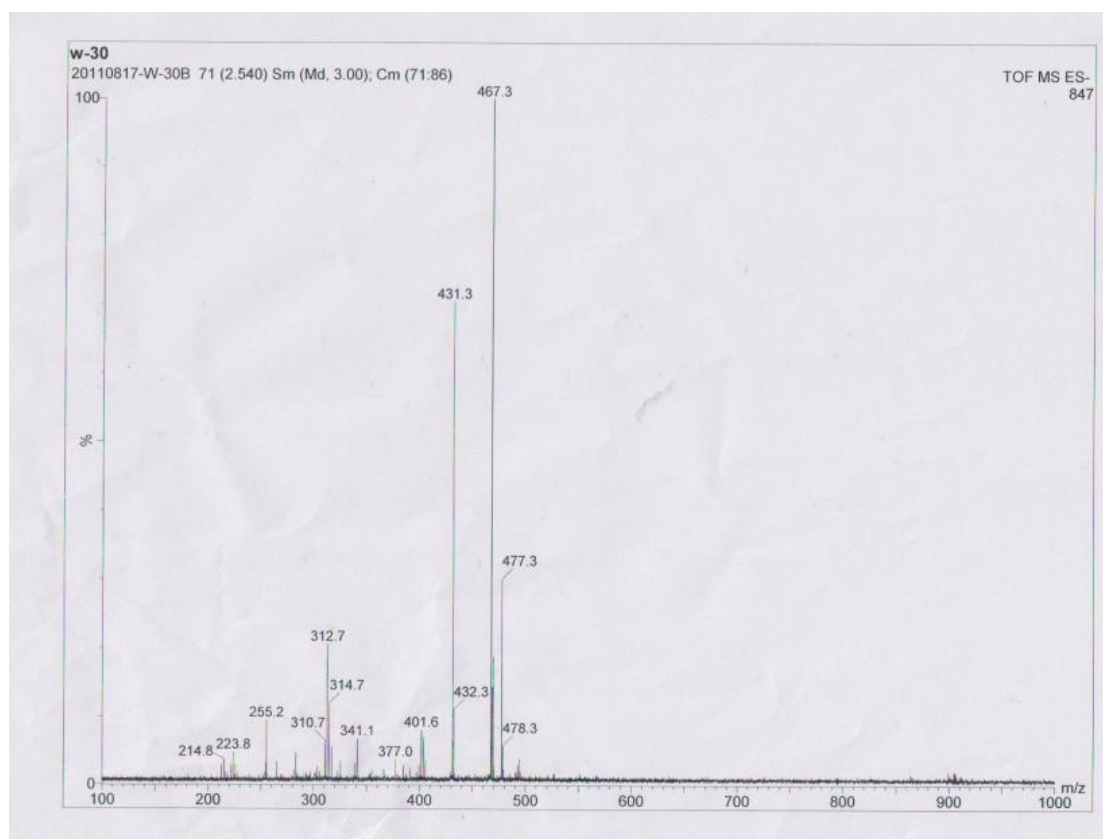

**Figure S3.**  $^1\text{H}$  NMR spectrum ( $\text{CDCl}_3$ , 600 MHz) of compound **1**.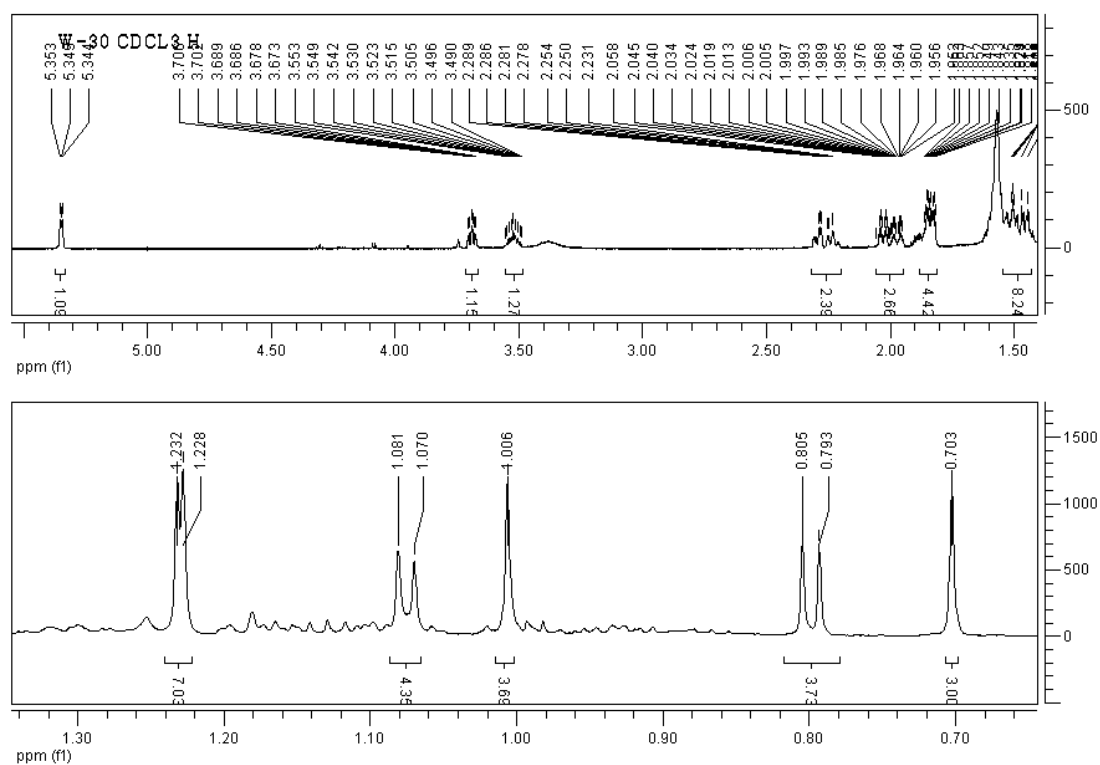**Figure S4.**  $^{13}\text{C}$  NMR and DEPT ( $\text{CDCl}_3$ , 125 MHz) spectra of compound **1**.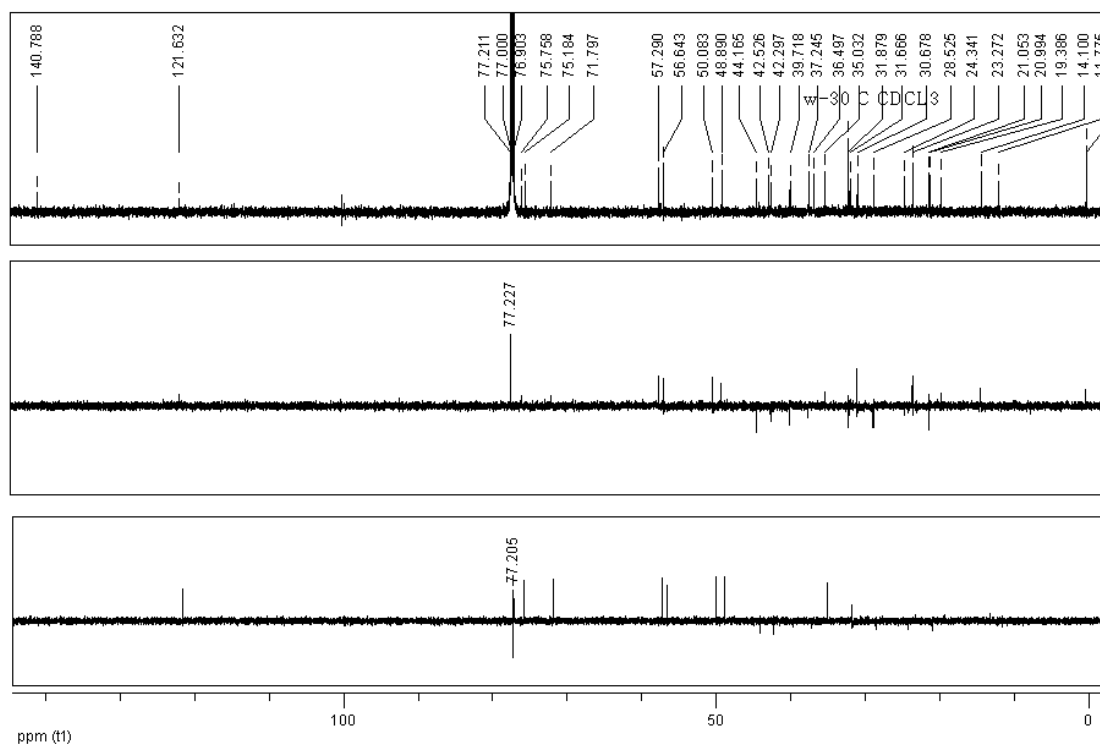

Figure S5. HMQC spectrum of compound 1.

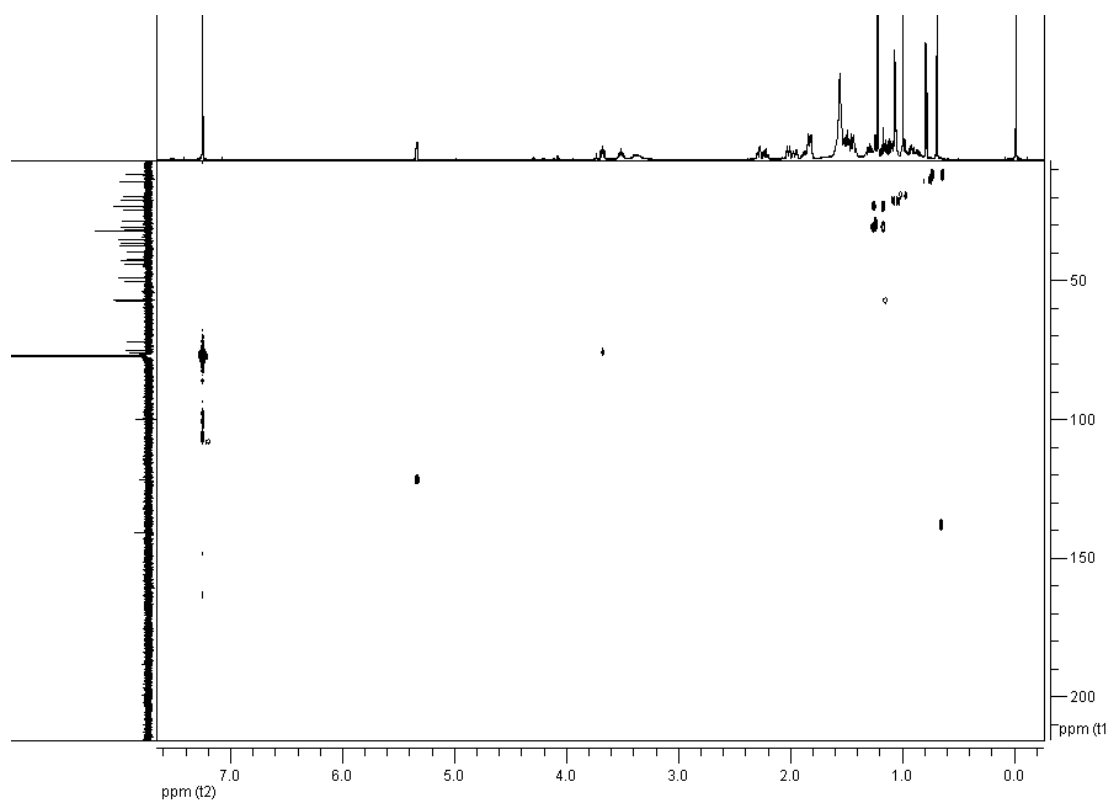

Figure S6.  $^1\text{H}$ - $^1\text{H}$  COSY spectrum of compound 1.

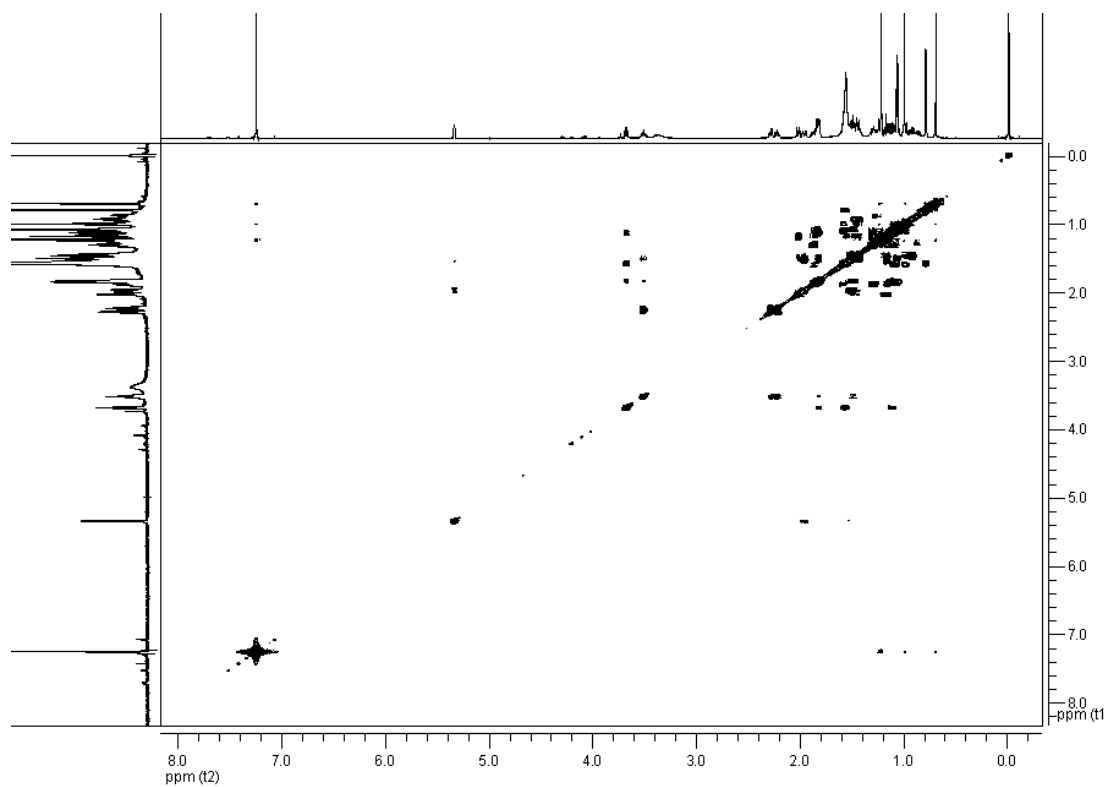

Figure S7. HMBC spectrum of compound 1.

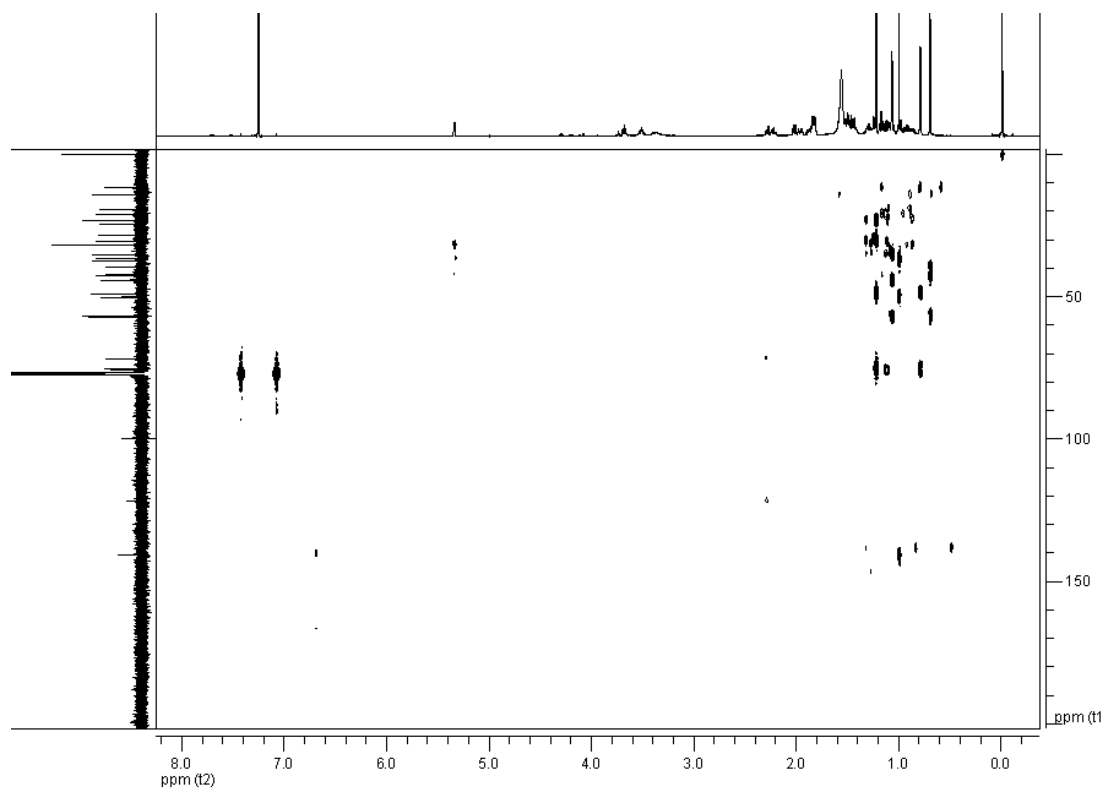

Figure S8. NOESY spectrum of compound 1.

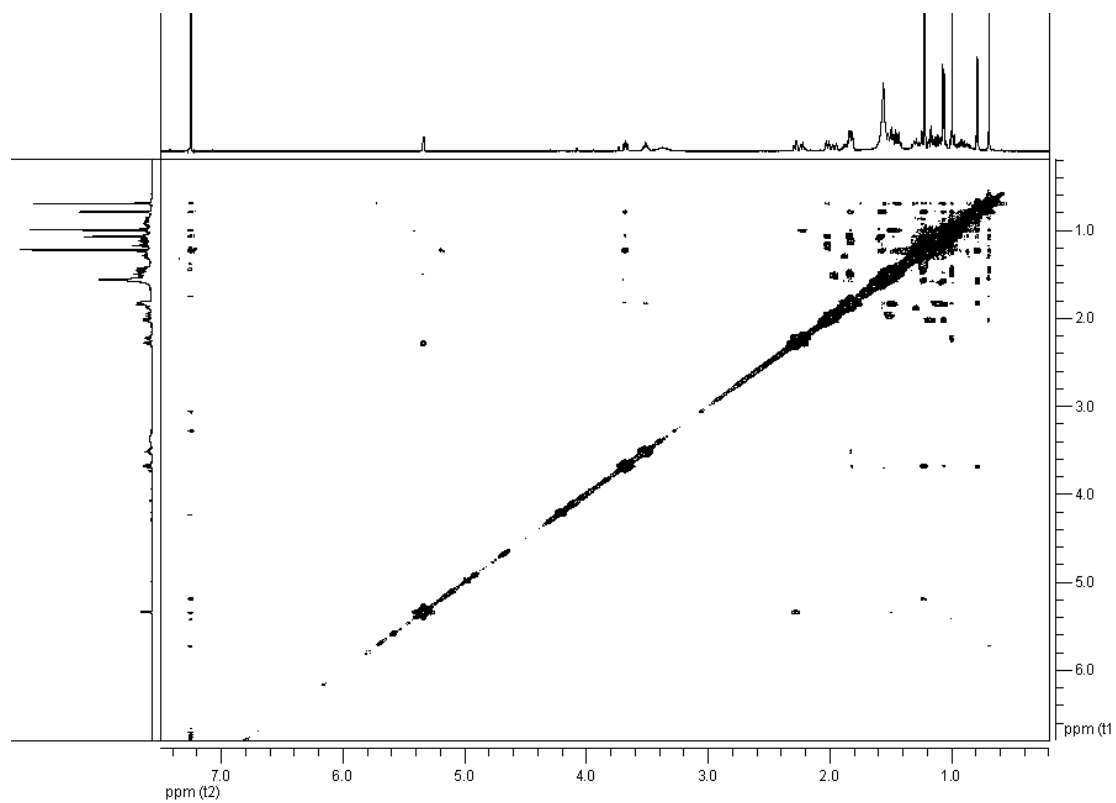

**Figure S9. HR-ESI-MS of compound 2.**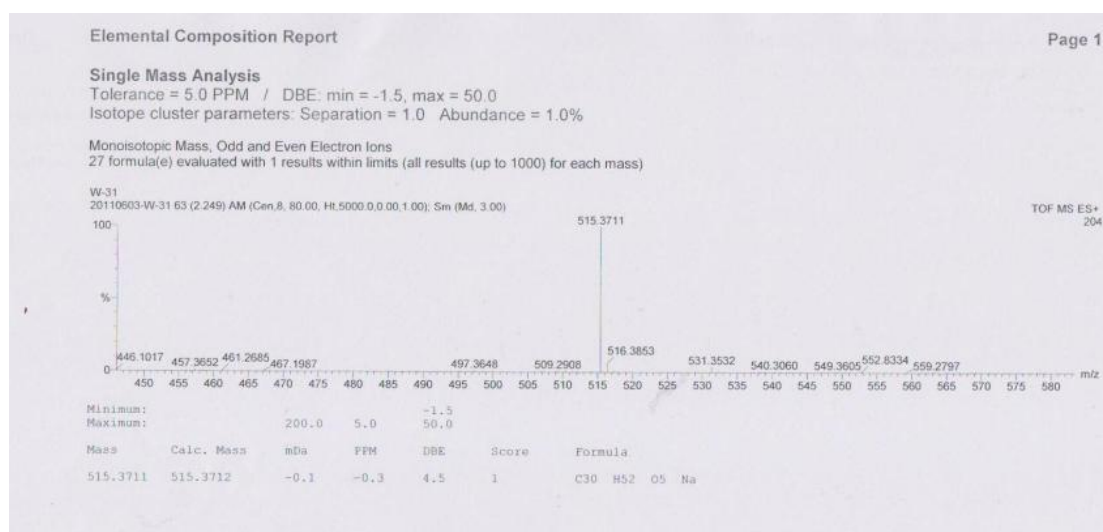**Figure S10. ESI-MS of compound 2.**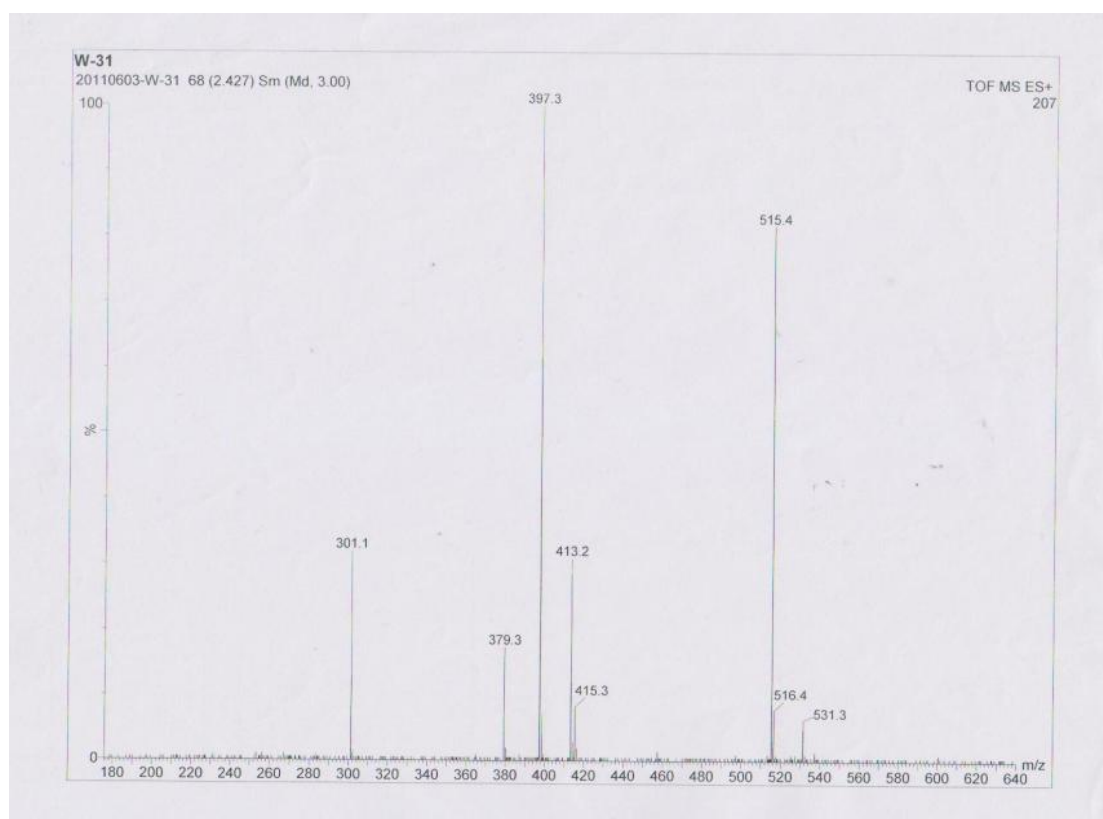

**Figure S11.**  $^1\text{H}$  NMR spectrum ( $\text{CD}_3\text{OD}$ , 600 MHz) of compound 2.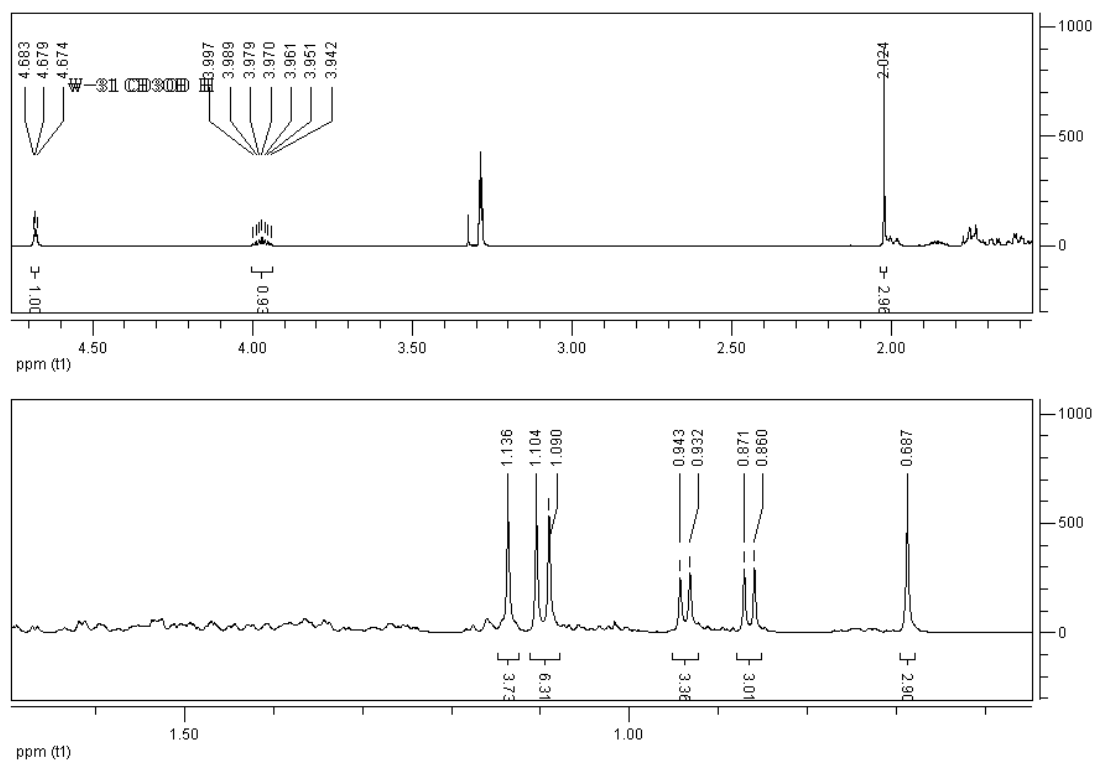**Figure S12.**  $^{13}\text{C}$  NMR and DEPT ( $\text{CD}_3\text{OD}$ , 125 MHz) spectra of compound 2.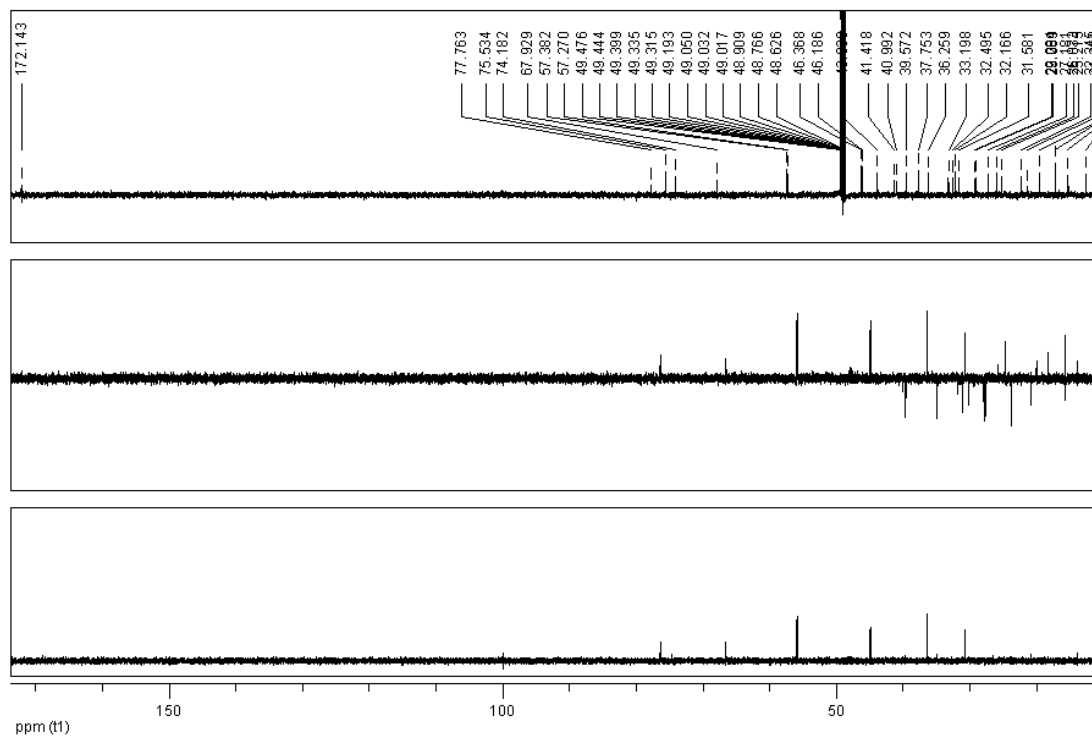

Figure S13. HMQC spectrum of compound 2.

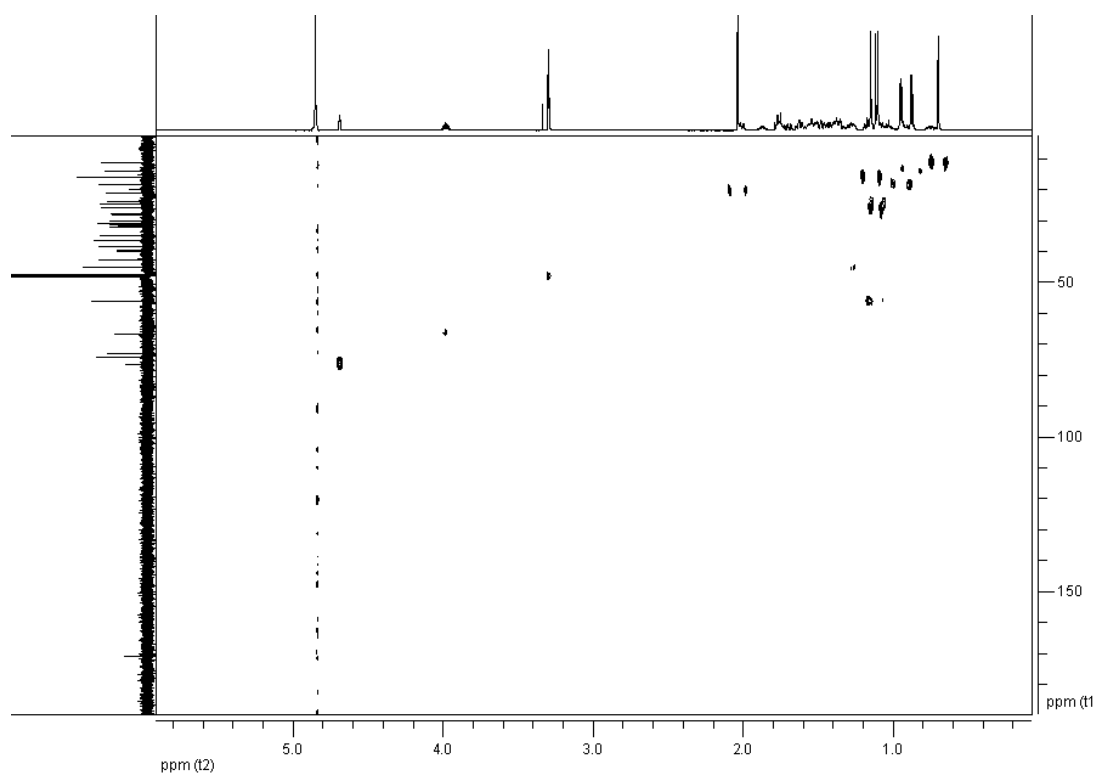

Figure S14.  $^1\text{H}$ - $^1\text{H}$  COSY spectrum of compound 2.

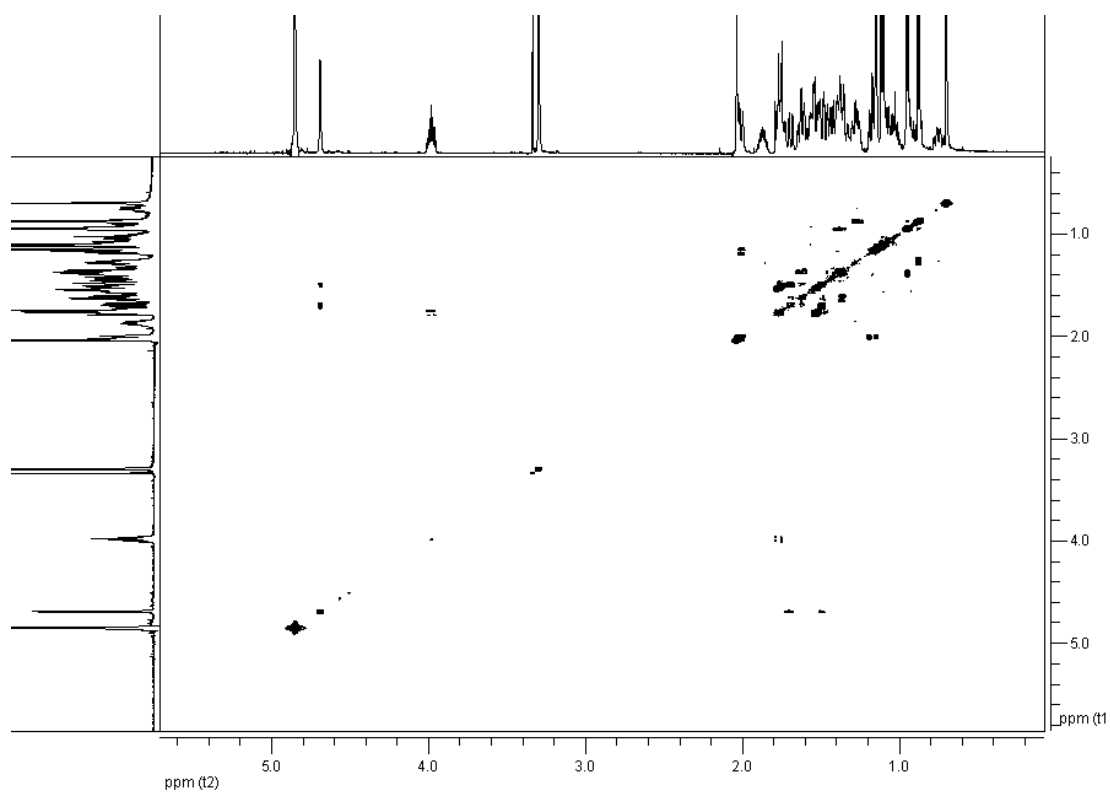



Figure S15. HMBC spectrum of compound 2.

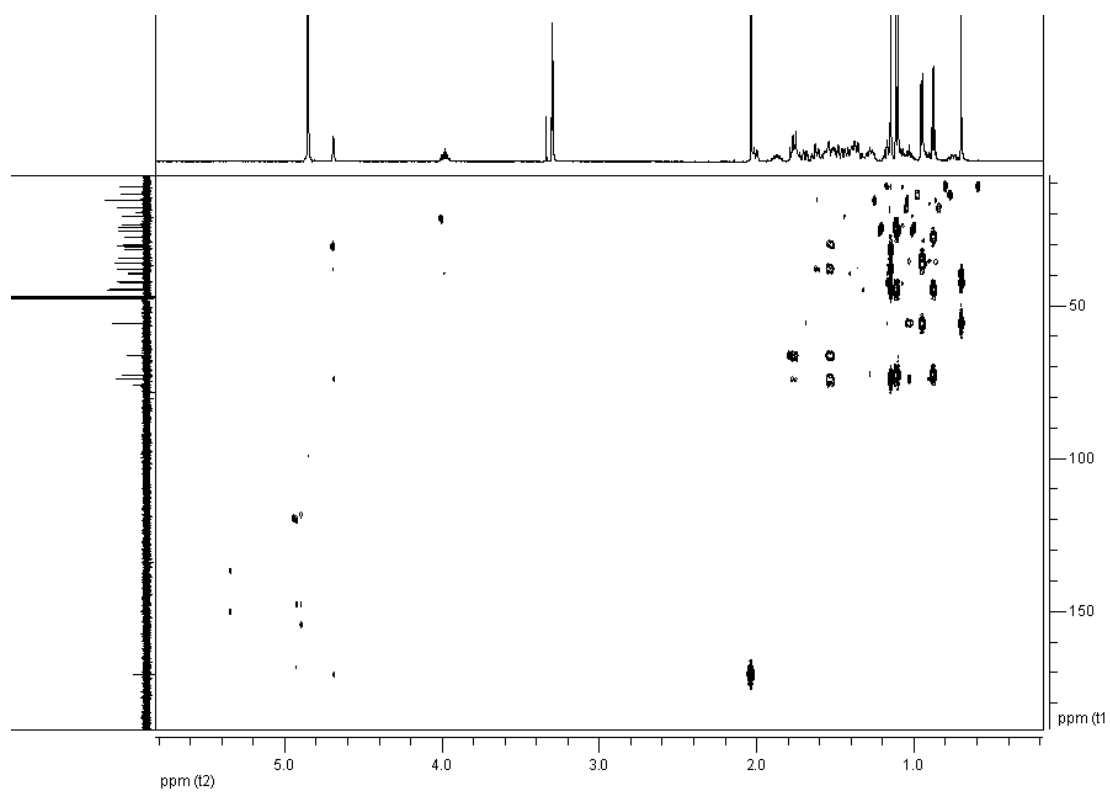

Figure S16. NOESY spectrum of compound 2.

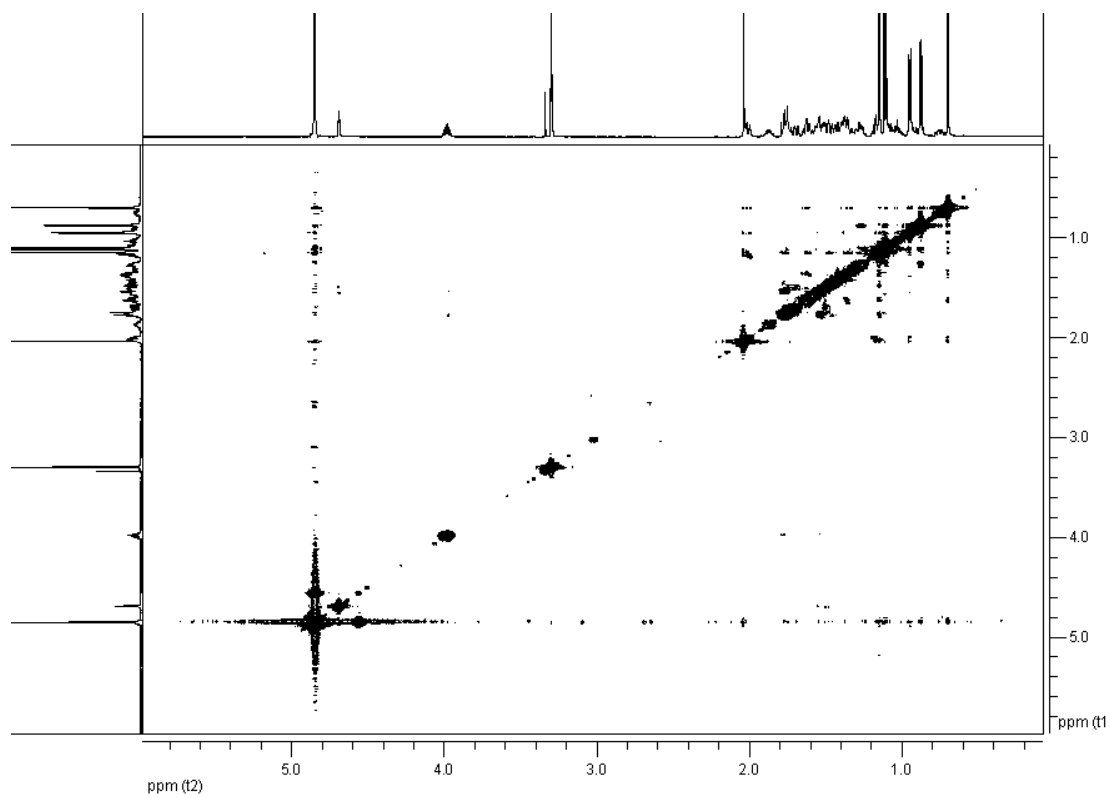

Figure S17. HR-ESI-MS of compound 3.

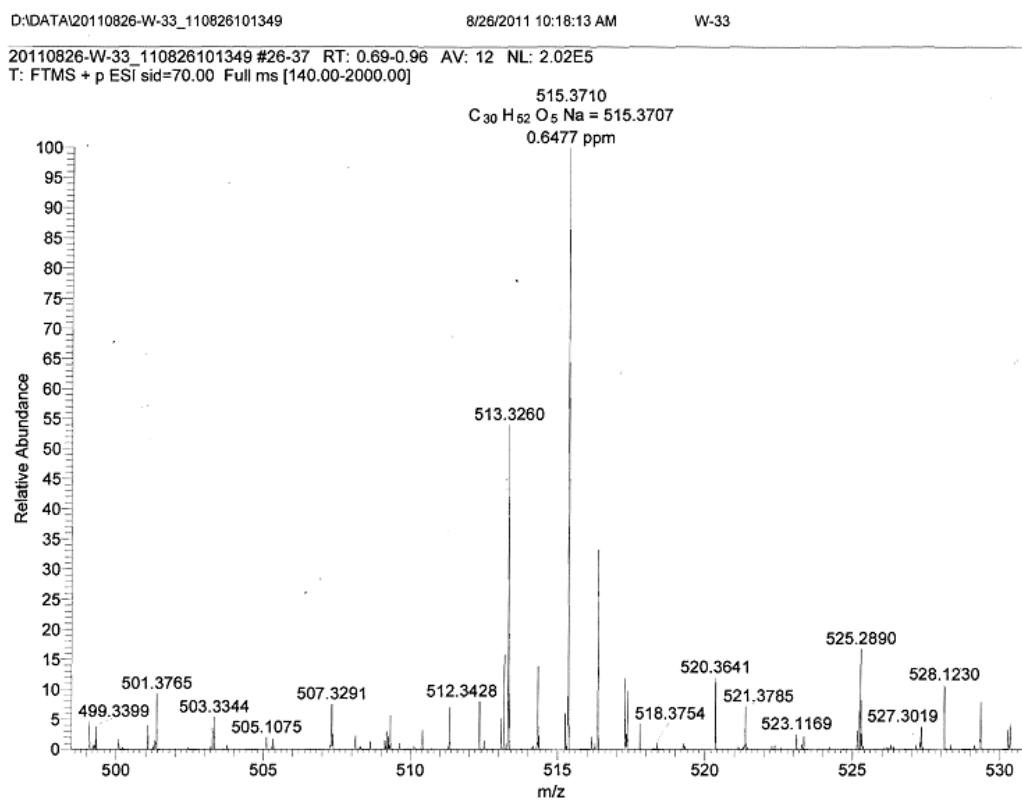

Figure S18. ESI-MS of compound 3.

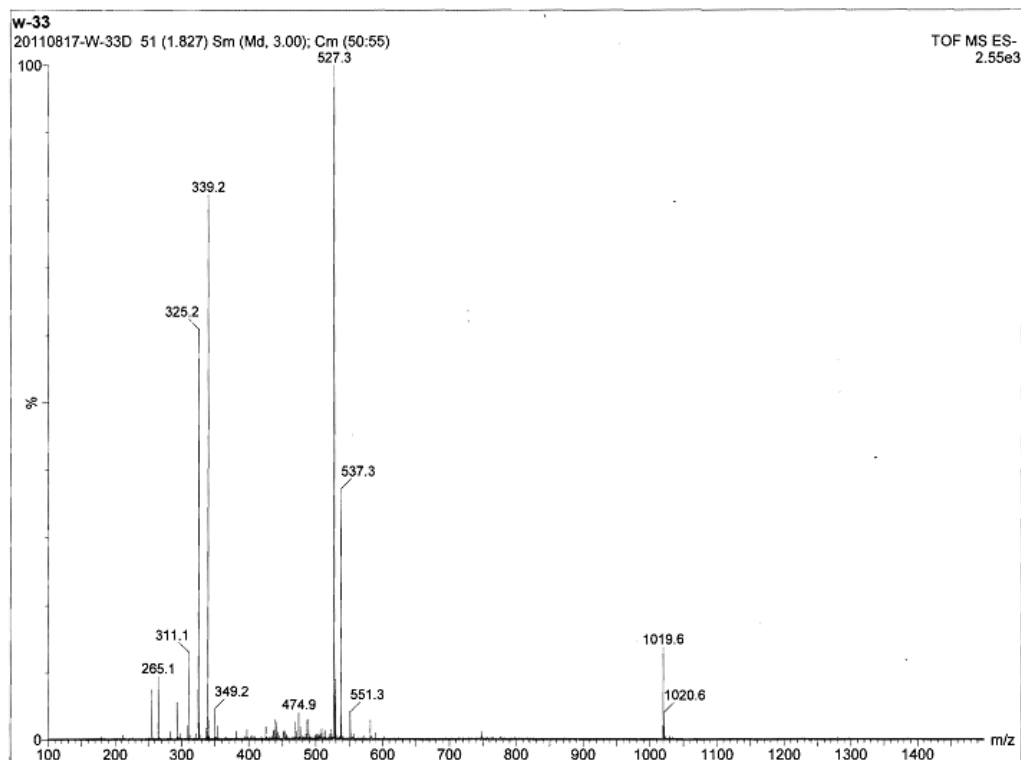

**Figure S19.**  $^1\text{H}$  NMR spectrum ( $\text{CDCl}_3$ , 600 MHz) of compound **3**.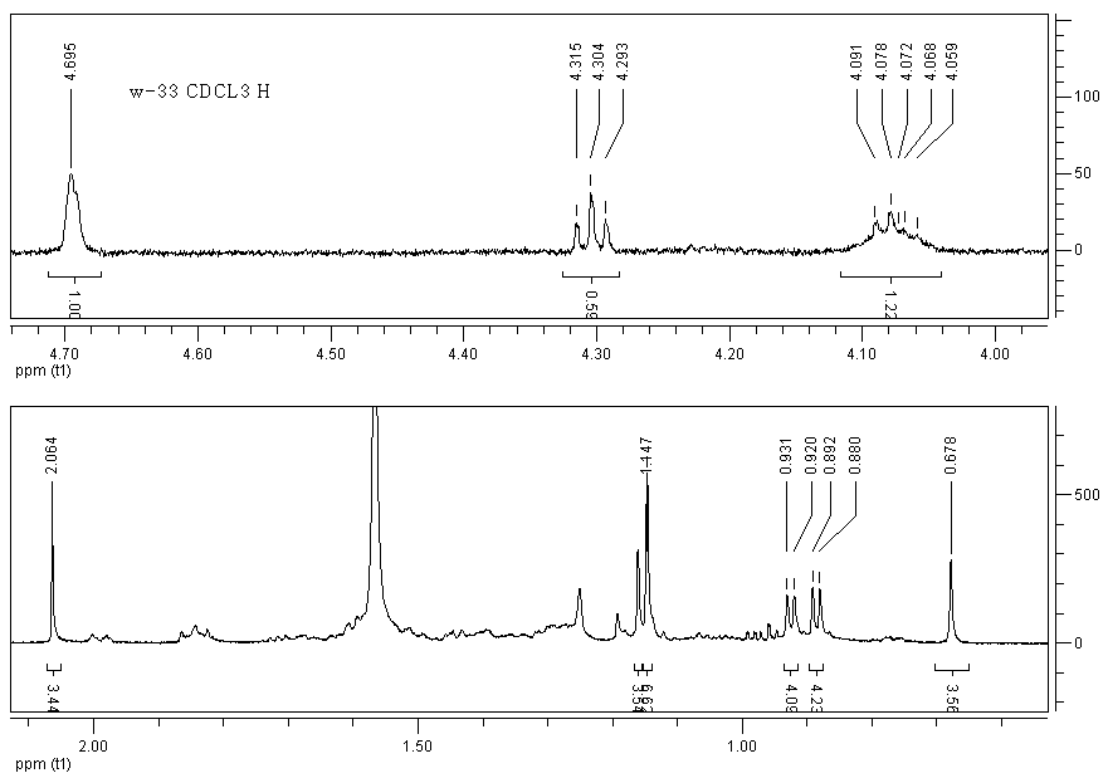**Figure S20.**  $^{13}\text{C}$  NMR spectrum ( $\text{CDCl}_3$ , 125 MHz) of compound **3**.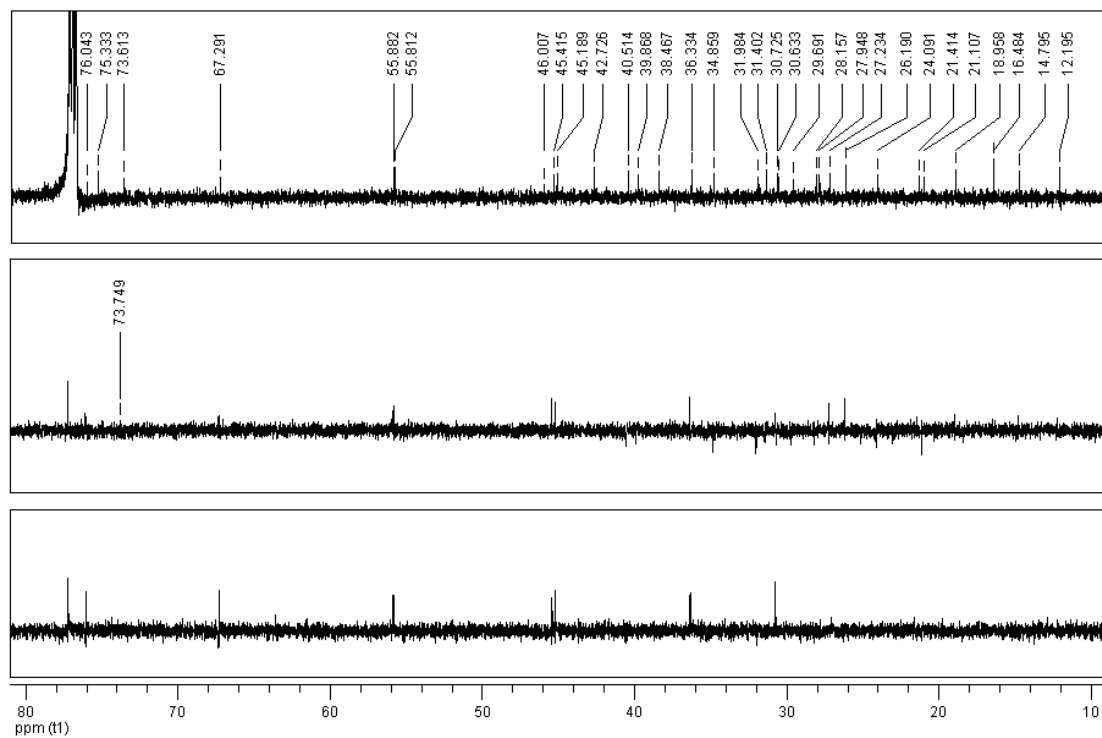

Figure S21. HMQC spectrum of compound 3.

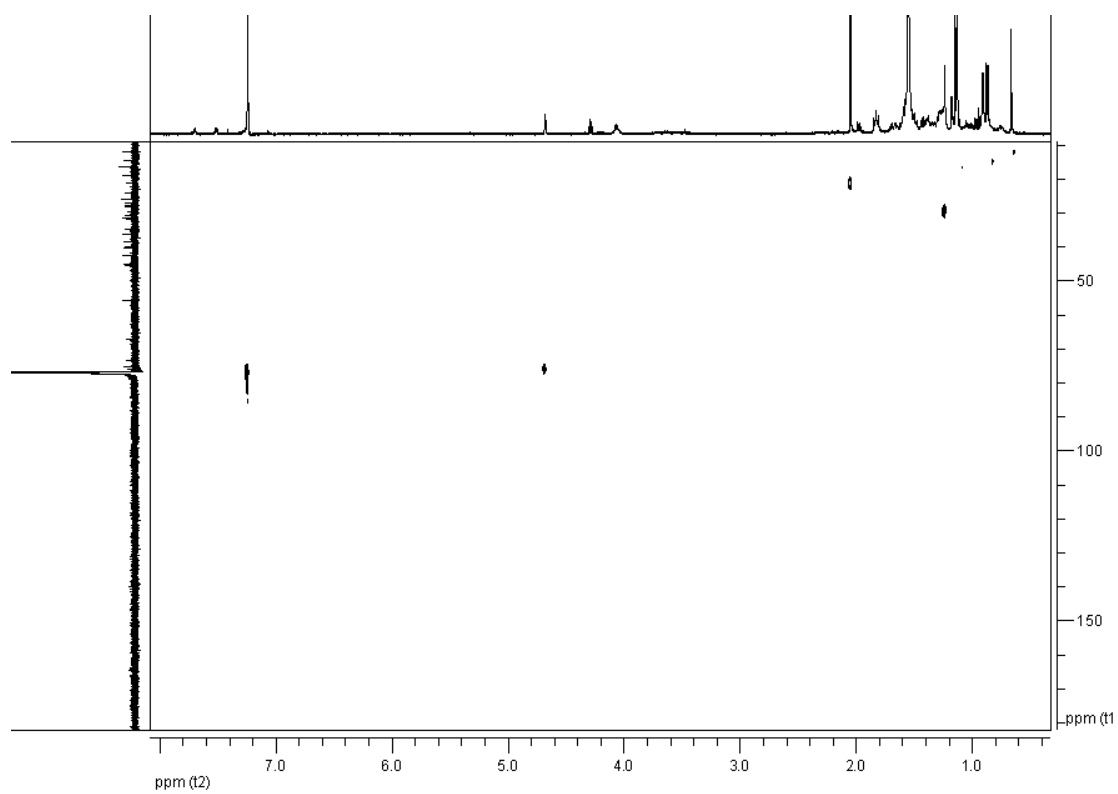

Figure S22. <sup>1</sup>H-<sup>1</sup>H COSY spectrum of compound 3.

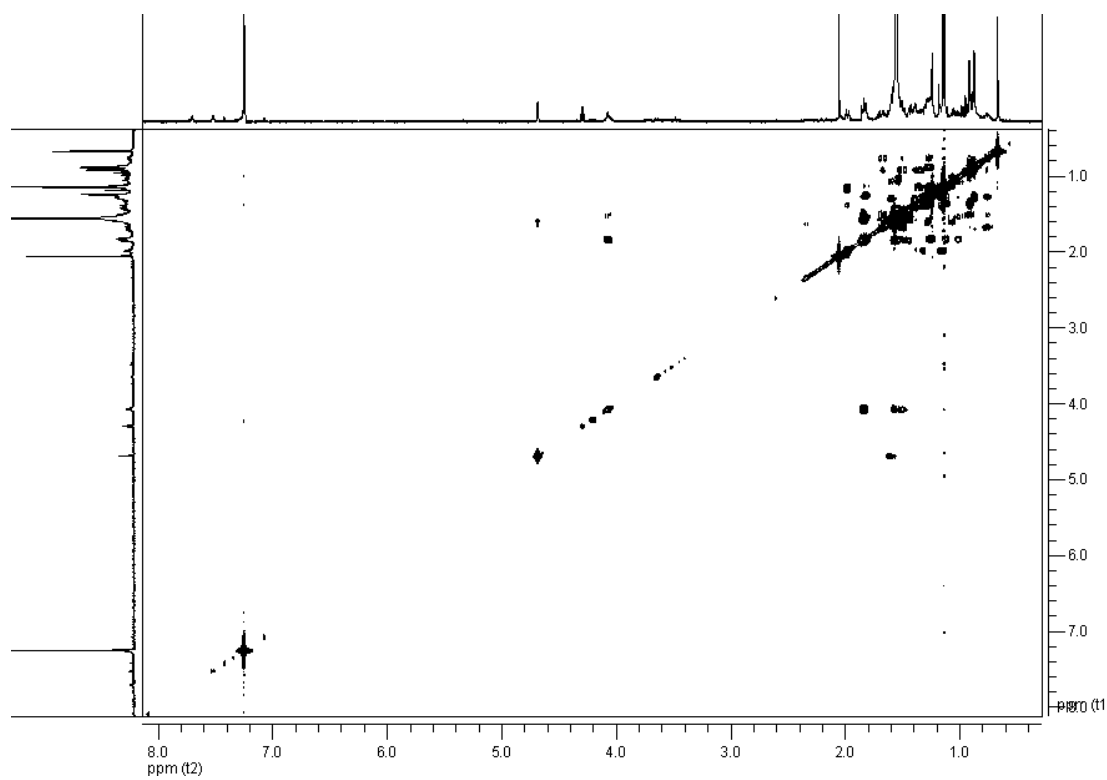

Figure S23. HMBC spectrum of compound 3.

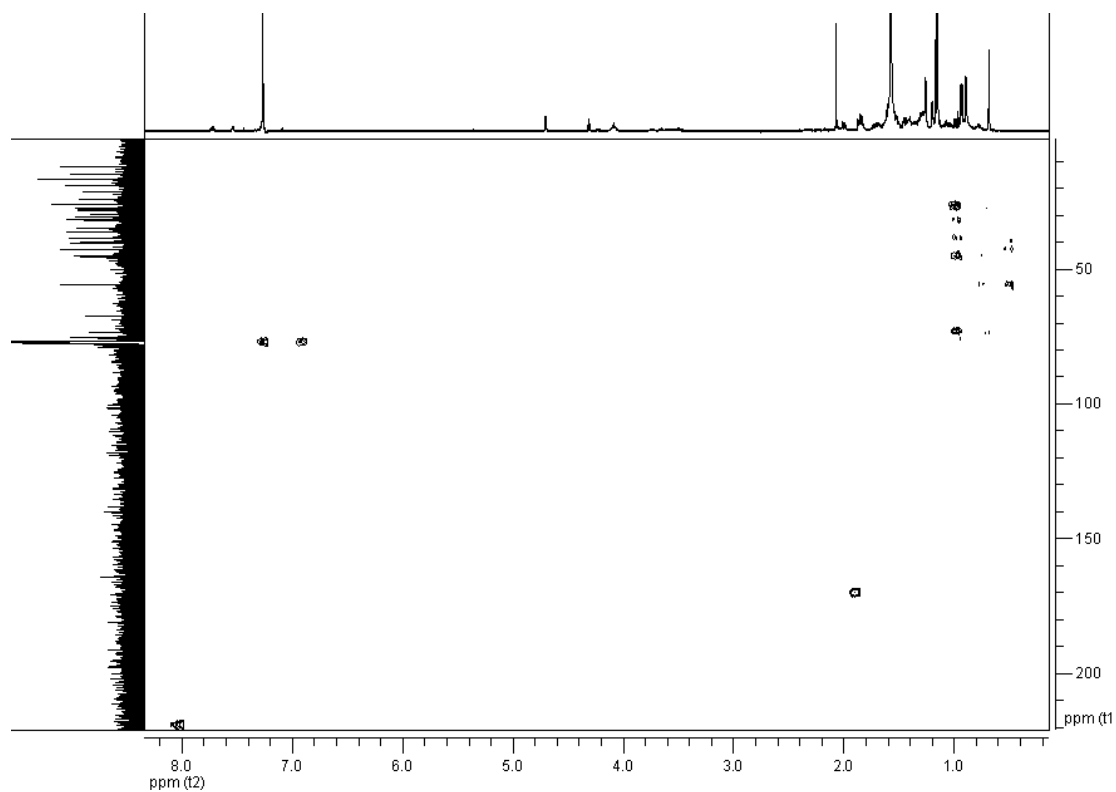

Figure S24. NOESY spectrum of compound 3.

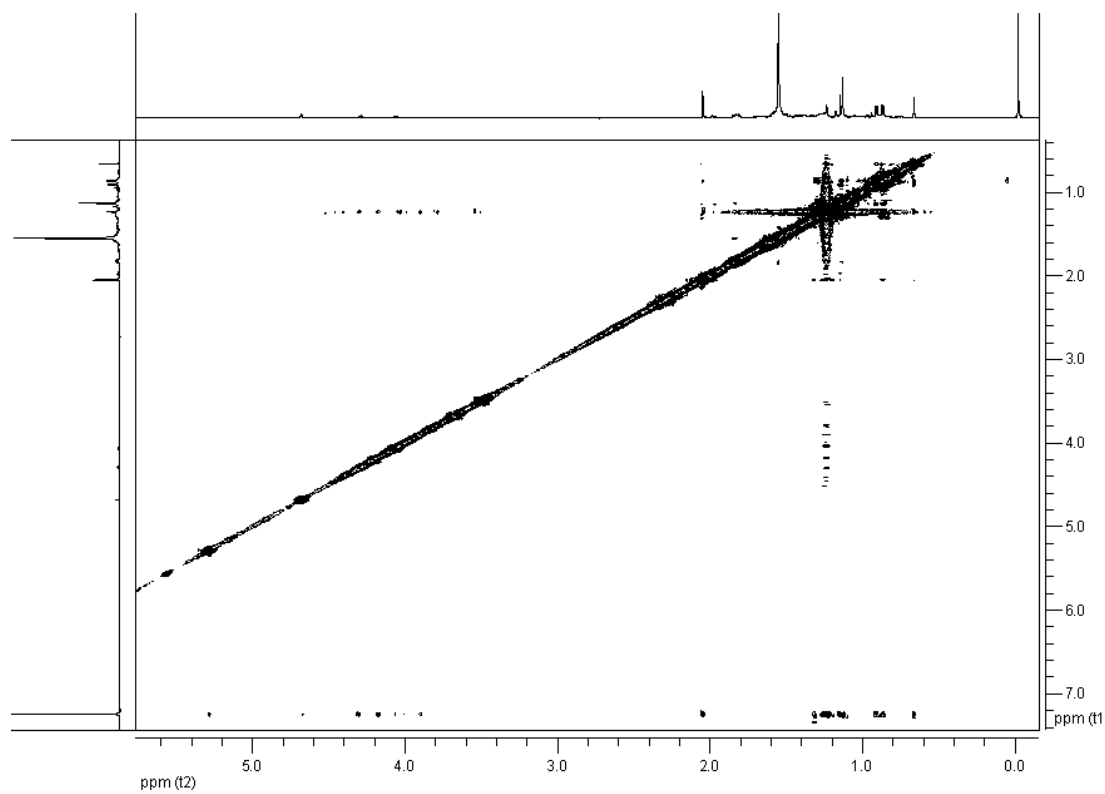

Figure S25.  $^1\text{H}$  NMR spectrum ( $\text{CDCl}_3$ , 600 MHz) of **1s**.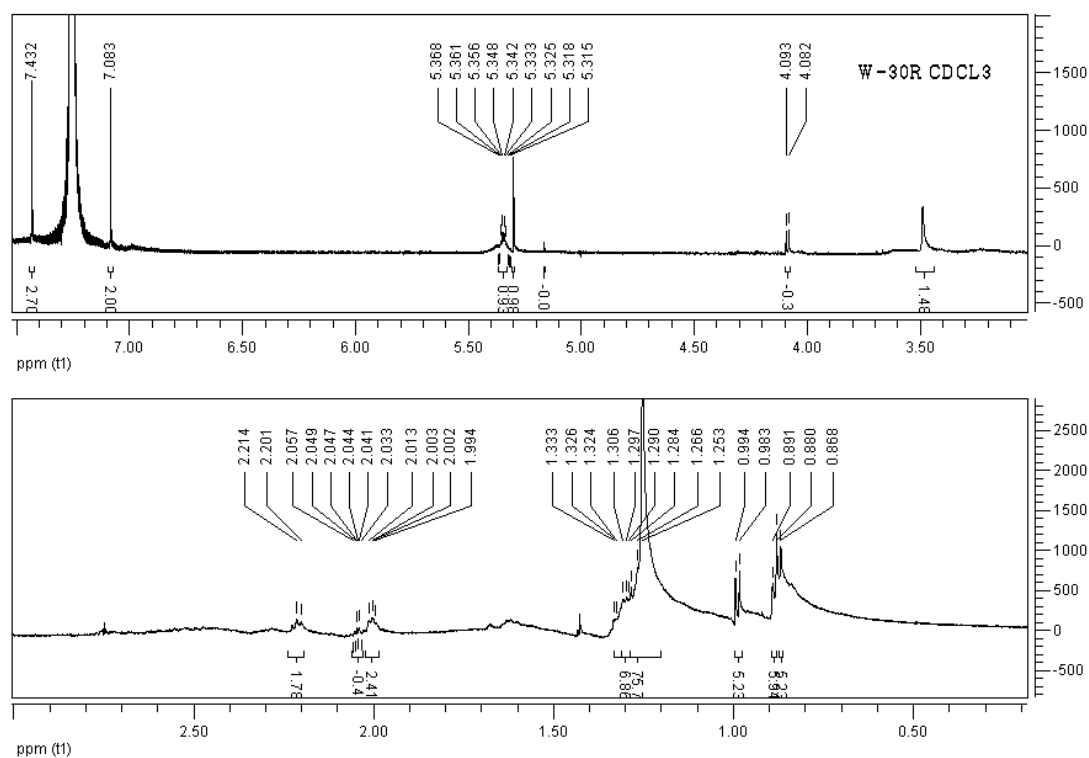Figure S26.  $^1\text{H}$ - $^1\text{H}$  COSY spectrum of **1s**.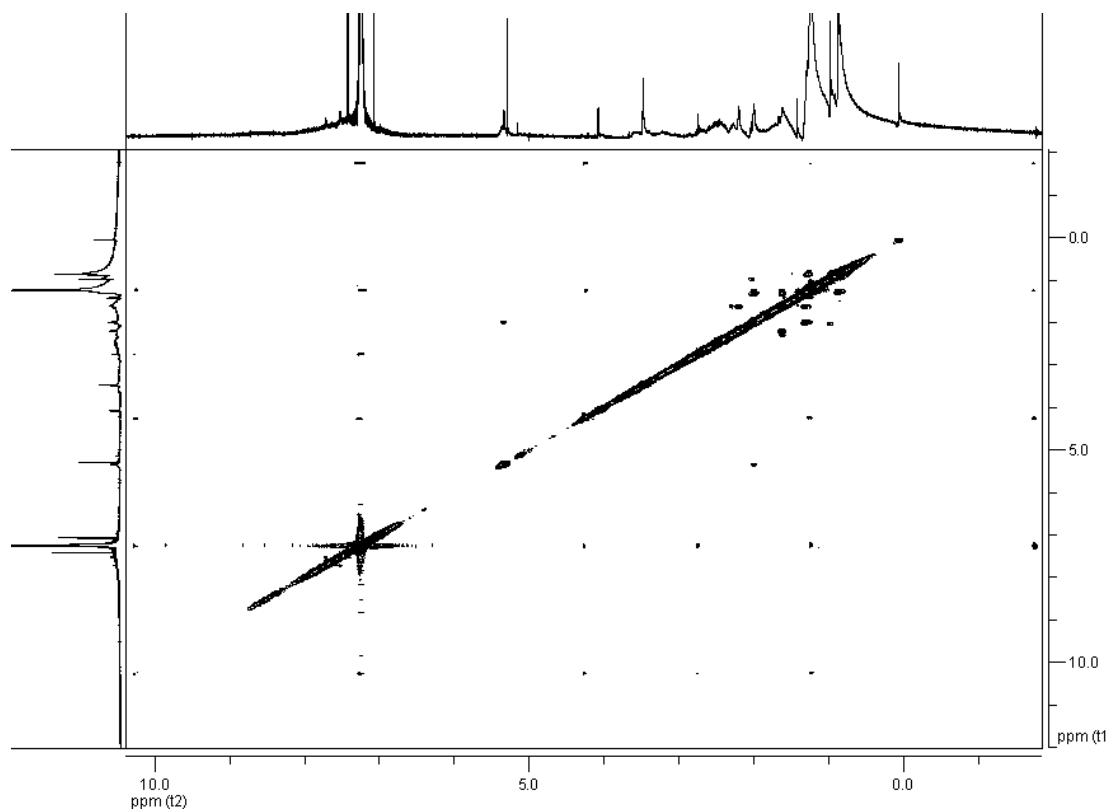

Figure S27.  $^1\text{H}$  NMR spectrum ( $\text{CDCl}_3$ , 600 MHz) of **1r**.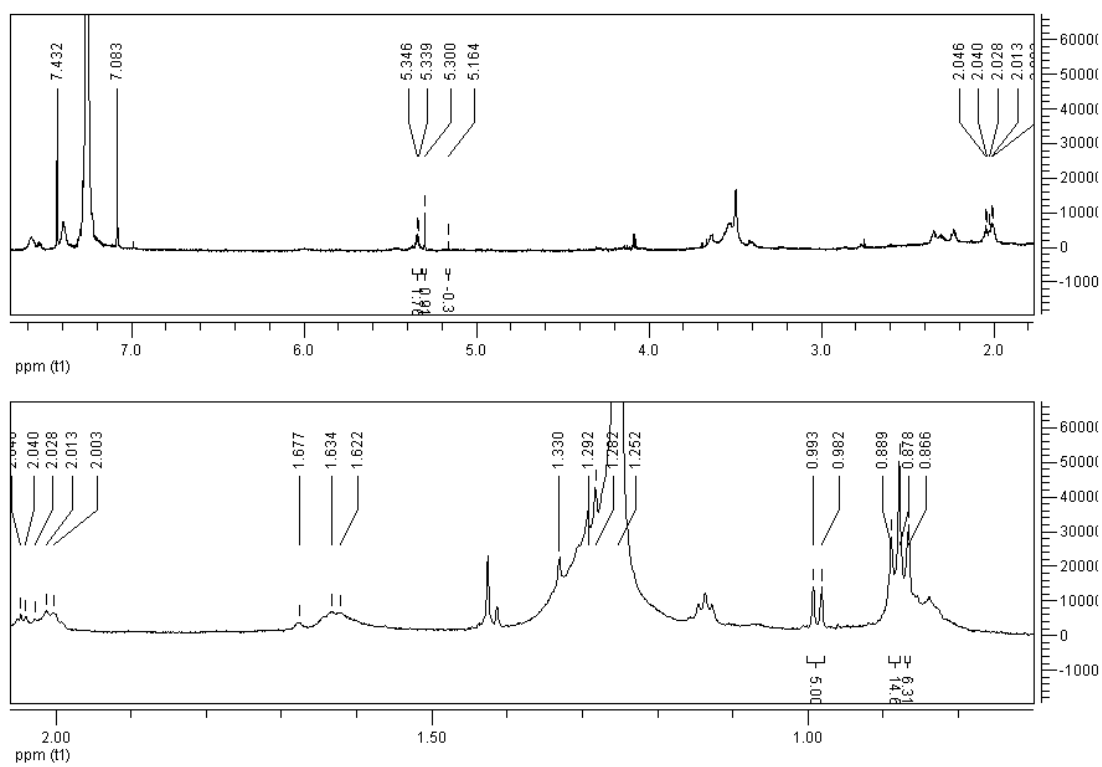Figure S28.  $^1\text{H}$ - $^1\text{H}$  COSY spectrum of **1r**.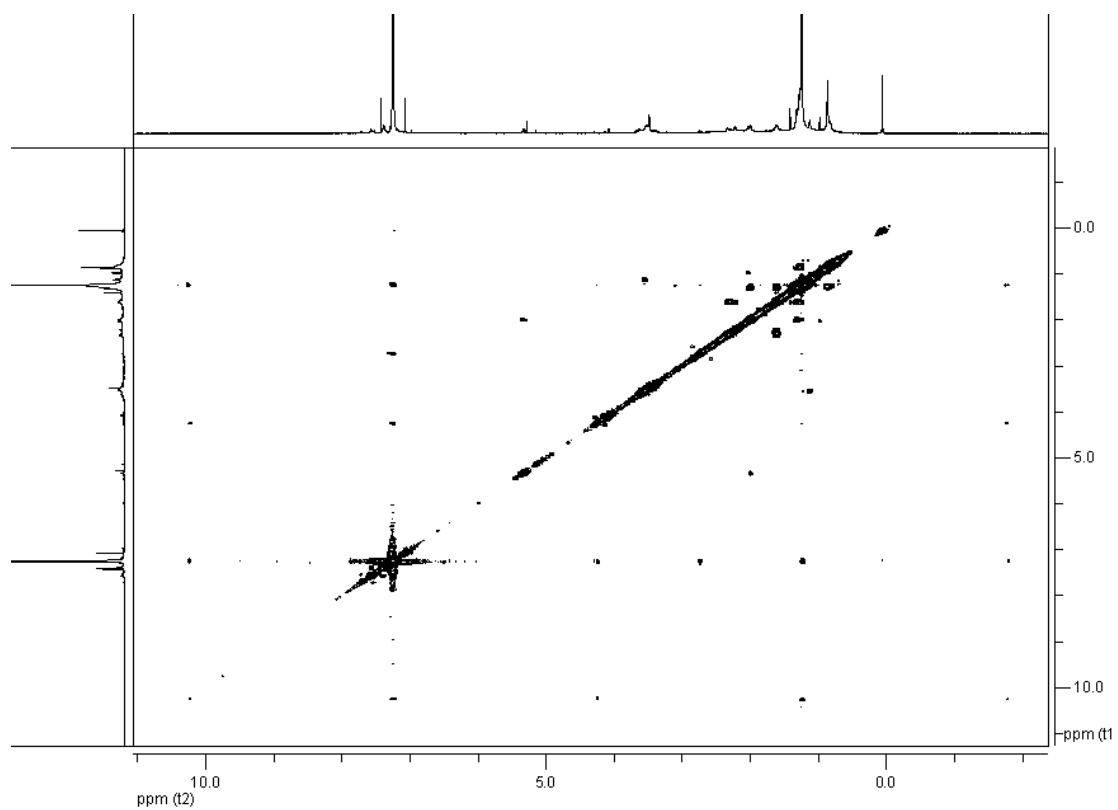

Supplement: marinedrugs-10-01422-s001.pdf [file marinedrugs-10-01422-s001.pdf]
